# Supplementary material
Source: Springer Nature journal article supplement (https://www.springermedizin.de/resource/supplementary/12985_2009_602_MOESM13_ESM.pdf/9608544)

0.002

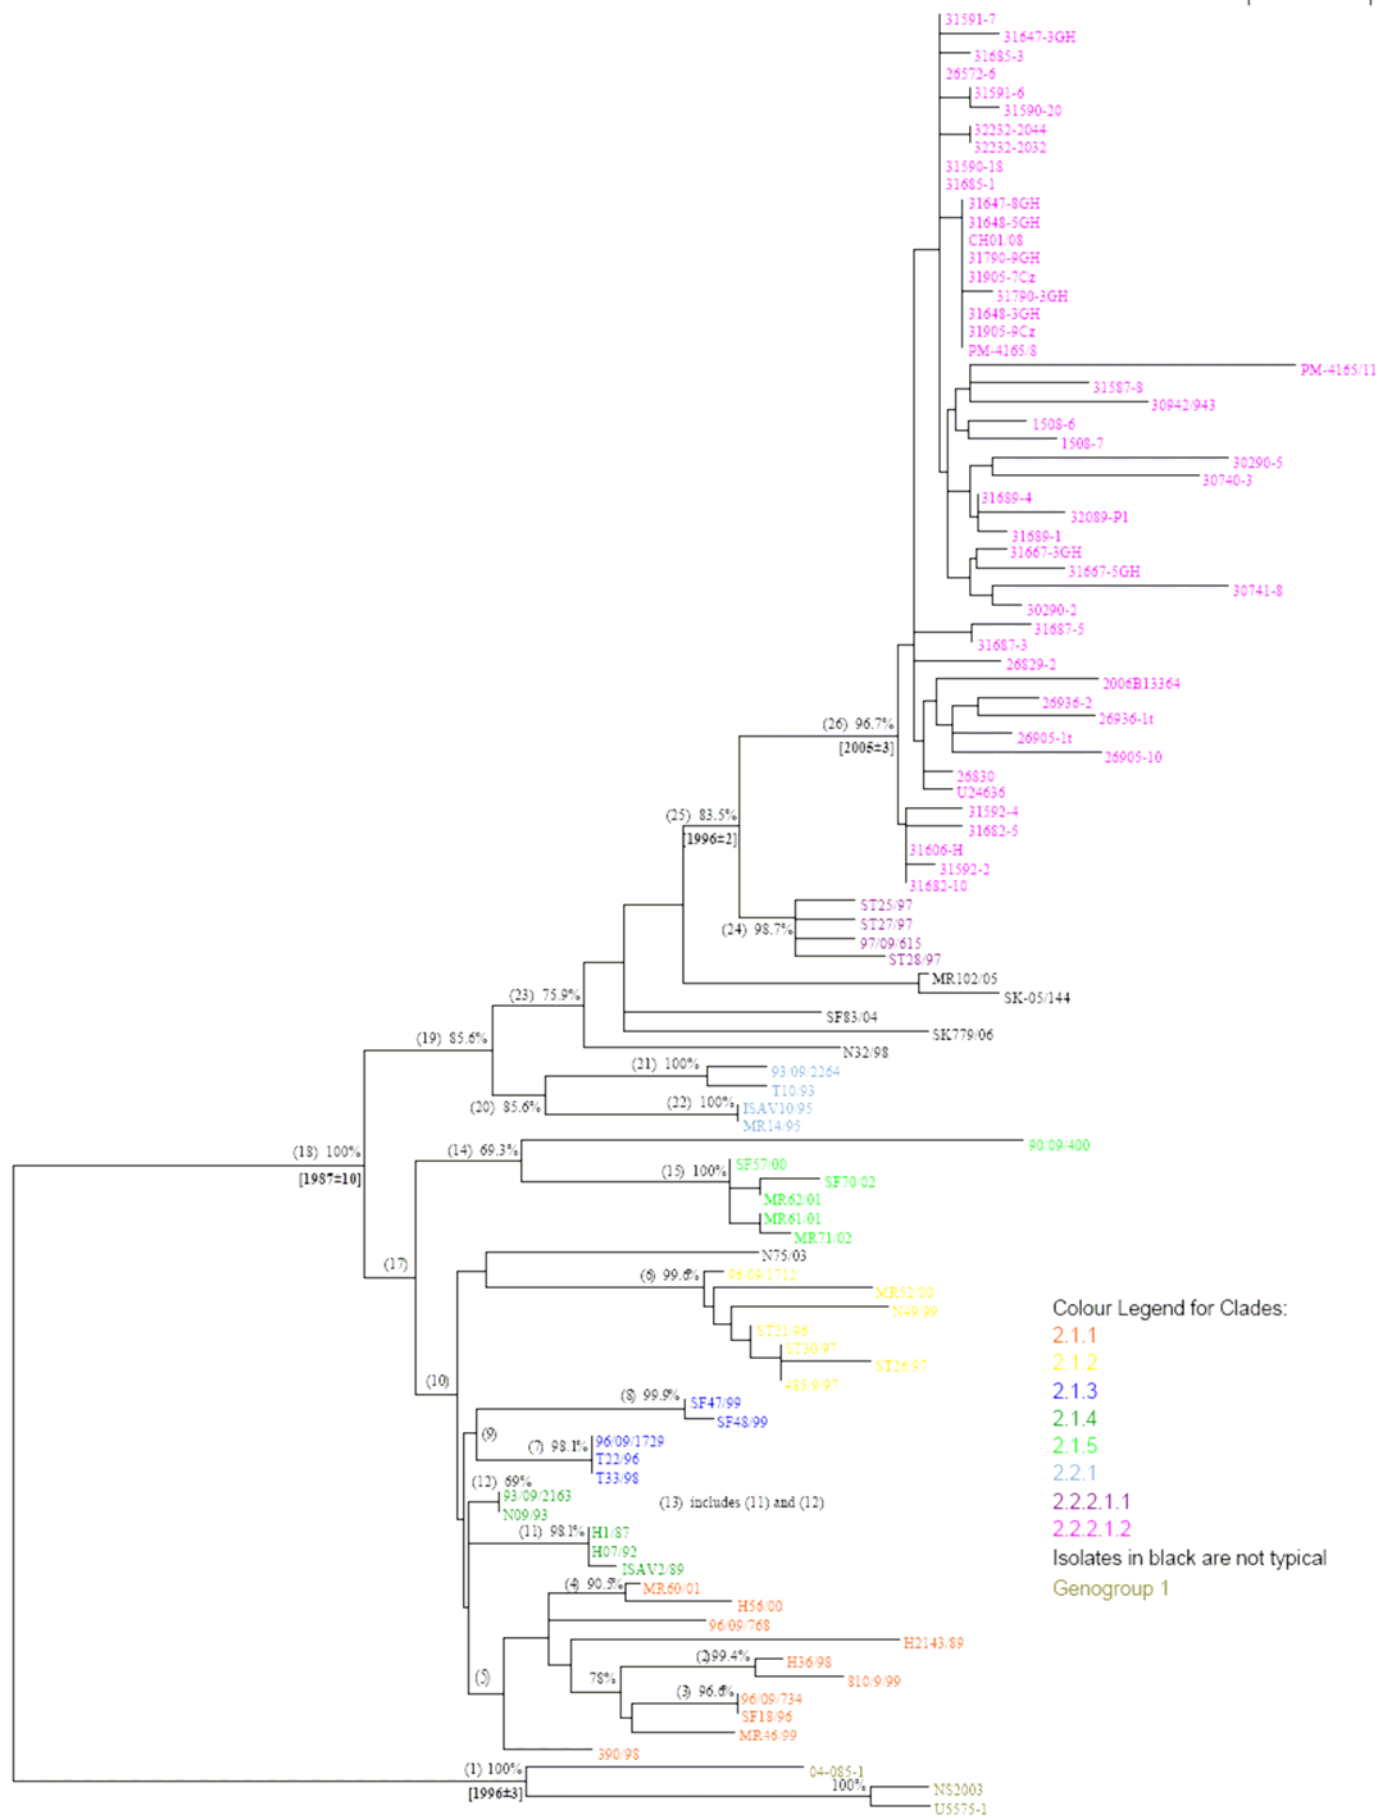

Colour Legend for Clades:

- 2.1.1
- 2.1.2
- 2.1.3
- 2.1.4
- 2.1.5
- 2.2.1
- 2.2.2.1.1
- 2.2.2.1.2

Isolates in black are not typical Genogroup 1

Supplement: MOESM13 [file 9608544]
